# Supplementary material for: Identifying Troublesome Jargon in Biology: Discrepancies between Student Performance and Perceived Understanding
Source: Atypon-hosted journal article supplement (doi:10.1187/cbe.17-07-0118), 2019-02-01
Supplement: combinedsupmats.pdf [file combinedsupmats.pdf]

# Supplemental Material

*CBE—Life Sciences Education*

Zukswert *et al.*

## Supplementary Index

### **TableS1\_Jargon.pdf**

This table lists all the jargon terms used in this study, the course in which the term was taught, the number of students defining the term, the category of the term, and the percentage of students defining this term who thought they understood. (PDF, 2 pages, 59 KB).

### **TableS2\_Jargon.pdf**

This table lists categories of terms used in the study, sample sizes, the median and mean percentage of students defining the terms who thought they understood them, and the results of Kruskal-Wallis tests comparing % thought understood of these terms to those in every other category. (PDF, 1 page, 46 KB).

### **Table S3\_Jargon.pdf**

This table lists all 54 terms that were coded for accuracy. For each term, the sample size, category, % correct, % incorrect, % unanswered, % partially correct, % match, and % mismatch values are listed. (PDF, 3 pages, 68 KB).

Table S1. List of all jargon terms used in the study, along with the course (200 or 234), sample size (*n*), jargon category, and % thought understood

| Term                          | Course | <i>n</i> | Category                            | % Thought Understood |
|-------------------------------|--------|----------|-------------------------------------|----------------------|
| Actin                         | 200    | 17       | Molecular                           | 100.0                |
| Activator                     | 200    | 17       | Incompatible Ambiguity, Molecular   | 58.82                |
| Adaptation                    | 200    | 11       | Incompatible Ambiguity              | 81.82                |
| Allele                        | 234    | 24       | Information                         | 100.00               |
| Allosteric                    | 200    | 15       | Molecular, Process                  | 26.67                |
| Assay                         | 200    | 19       | Practice                            | 26.32                |
| CDK (Cyclin-dependent kinase) | 200    | 19       | Molecular                           | 68.42                |
| Centromere                    | 200    | 17       | Molecular                           | 100.0                |
| Centrosome                    | 200    | 14       | Organelle                           | 100.0                |
| Checkpoint                    | 200    | 15       | Incompatible Ambiguity              | 93.33                |
| Chemiosmotic coupling         | 200    | 12       | Process                             | 66.67                |
| Chromatid                     | 200    | 10       | Organelle                           | 70.00                |
| Chromatin                     | 200    | 19       | Organelle                           | 94.74                |
| Chromosome                    | 200    | 10       | Organelle                           | 100.0                |
| Clathrin                      | 200    | 12       | Molecular                           | 83.33                |
| Cohesin                       | 200    | 19       | Molecular                           | 84.21                |
| Complementary                 | 200    | 17       | Incompatible Ambiguity              | 76.47                |
| Complementation               | 234    | 19       | Incompatible Ambiguity              | 100.0                |
| Conformation                  | 200    | 21       | Incompatible Ambiguity              | 80.95                |
| Cyclin                        | 200    | 13       | Molecular                           | 38.46                |
| Diploid                       | 234    | 34       | Information                         | 100.0                |
| Domain                        | 200    | 22       | Incompatible Ambiguity              | 77.27                |
| Dominant                      | 234    | 28       | Incompatible Ambiguity, Information | 100.0                |
| Dynein                        | 200    | 20       | Molecular                           | 90.00                |
| Endosome                      | 200    | 17       | Organelle                           | 76.47                |
| Epitope                       | 200    | 13       | Molecular                           | 0.00                 |
| Euchromatin                   | 200    | 22       | Organelle                           | 81.82                |
| Exon                          | 200    | 15       | Information                         | 80.00                |
| Experimental control          | 200    | 14       | Practice                            | 100.0                |
| Frequency                     | 234    | 39       | Incompatible Ambiguity, Information | 94.87                |
| Gain-of-function mutation     | 200    | 20       | Practice                            | 80.00                |
| Gene                          | 200    | 14       | Information                         | 100.0                |
| Gene regulation               | 200    | 12       | Process                             | 83.33                |
| Genome                        | 200    | 14       | Information                         | 92.86                |
| Genome sequence               | 234    | 30       | Information                         | 83.33                |
| Hydrophobic interaction       | 200    | 12       | Molecular                           | 100.0                |
| Intron                        | 200    | 18       | Information                         | 94.44                |
| Kinase                        | 200    | 13       | Molecular                           | 76.92                |
| Kinesin                       | 200    | 19       | Molecular                           | 68.42                |

|                           |     |    |                                     |       |
|---------------------------|-----|----|-------------------------------------|-------|
| Kinetochores              | 200 | 16 | Molecular                           | 68.75 |
| Ligand                    | 200 | 17 | Molecular                           | 41.18 |
| Locus                     | 234 | 21 | Information                         | 85.71 |
| Lysosome                  | 200 | 16 | Organelle                           | 93.75 |
| Macromolecular<br>complex | 200 | 20 | Molecular                           | 40.00 |
| Matrix                    | 200 | 14 | Organelle                           | 85.71 |
| Microtubule               | 200 | 11 | Molecular                           | 90.91 |
| Model                     | 200 | 17 | Incompatible Ambiguity, Practice    | 82.35 |
| Most Likely               | 234 | 38 | Incompatible Ambiguity, Practice    | 92.11 |
| Mutation                  | 200 | 12 | Process                             | 100.0 |
| Myosin                    | 200 | 13 | Molecular                           | 61.54 |
| Necessary                 | 200 | 23 | Incompatible Ambiguity, Practice    | 100.0 |
| Non-covalent interaction  | 200 | 14 | Molecular                           | 85.71 |
| Oncogene                  | 234 | 29 | Information                         | 75.86 |
| Parental                  | 234 | 24 | Incompatible Ambiguity, Information | 95.83 |
| Phenotype                 | 200 | 13 | Information                         | 84.62 |
| Polarity                  | 200 | 22 | Incompatible Ambiguity              | 95.45 |
| Protease                  | 200 | 13 | Molecular                           | 38.46 |
| Proto-oncogene            | 234 | 25 | Information                         | 64.00 |
| Recombinant               | 234 | 21 | Information                         | 100.0 |
| Repressor                 | 200 | 15 | Incompatible Ambiguity, Molecular   | 80.00 |
| Secretion                 | 200 | 15 | Process                             | 80.00 |
| SNARE                     | 200 | 11 | Molecular                           | 63.64 |
| Stroma                    | 200 | 20 | Organelle                           | 90.0  |
| Sufficient                | 200 | 11 | Incompatible Ambiguity              | 100.0 |
| Template                  | 200 | 12 | Incompatible Ambiguity, Information | 100.0 |
| Theory                    | 200 | 16 | Incompatible Ambiguity, Practice    | 93.75 |
| Transcription             | 200 | 18 | Incompatible Ambiguity, Information | 100.0 |
| Translation               | 200 | 13 | Incompatible Ambiguity, Information | 100.0 |
| Tubulin                   | 200 | 13 | Molecular                           | 92.31 |
| Tumor suppressor          | 234 | 26 | Information                         | 76.92 |
| Vacuole                   | 200 | 12 | Organelle                           | 66.67 |
| Vesicle                   | 200 | 19 | Organelle                           | 94.74 |

---

Table S2. Jargon categories and students' perceived understanding of them. The median and mean percent of students who thought they understood the term (% thought understood) is reported here. Higher values mean that more students reportedly understood the term. The chi-square ( $\chi^2$ ) statistic of the Kruskal-Wallis rank sum test is reported, and *p*-values of 0.008 or less (in bold and italics) are considered significant. *P*-values between 0.008 and 0.10 are considered marginally significant.

| Category               | <i>n</i> | Median % Thought Understood | Mean % Thought Understood | $\chi^2$ | <i>p</i>         |
|------------------------|----------|-----------------------------|---------------------------|----------|------------------|
| Incompatible Ambiguity | 20       | 94.3                        | 90.2                      | 4.89     | 0.03             |
| Molecular              | 23       | 68.8                        | 67.7                      | 10.9     | <b>&lt;0.008</b> |
| Practice               | 7        | 92.1                        | 82.1                      | 0.15     | 0.70             |
| Organelle              | 11       | 90.0                        | 86.7                      | 0.24     | 0.62             |
| Process                | 7        | 83.3                        | 79.5                      | 0.03     | 0.86             |
| Information            | 19       | 94.9                        | 91.0                      | 6.47     | <b>0.01</b>      |

Table S3. Terms coded for accuracy of student definition. Fifty-four terms were coded in total: 19 information terms, 23 molecular terms, and 12 terms that were incompatible ambiguity and neither molecular nor information.

| Term                          | Course | <i>n</i> | Jargon Category                           | % Correct | % Incorrect | % Unanswered | % Partially Correct | % Match | % Mismatch |
|-------------------------------|--------|----------|-------------------------------------------|-----------|-------------|--------------|---------------------|---------|------------|
| Actin                         | 200    | 17       | Molecular<br>Incompatible                 | 58.82     | 5.88        | 9.09         | 35.29               | 58.82   | 5.88       |
| Activator                     | 200    | 17       | Molecular<br>Incompatible                 | 11.76     | 52.94       | 17.65        | 17.65               | 58.82   | 23.53      |
| Adaptation                    | 200    | 11       | Ambiguity                                 | 0.00      | 81.82       | 9.09         | 9.09                | 18.18   | 72.73      |
| Allele                        | 234    | 24       | Information                               | 16.67     | 16.67       | 0.00         | 66.67               | 16.67   | 16.67      |
| Allosteric                    | 200    | 15       | Molecular, Process                        | 13.33     | 13.33       | 53.33        | 13.33               | 73.33   | 13.33      |
| CDK (Cyclin-dependent kinase) | 200    | 19       | Molecular                                 | 42.11     | 10.53       | 21.05        | 26.32               | 73.68   | 0.00       |
| Centromere                    | 200    | 17       | Molecular<br>Incompatible                 | 11.76     | 29.41       | 0.00         | 58.82               | 11.76   | 29.41      |
| Checkpoint                    | 200    | 15       | Ambiguity                                 | 0.00      | 13.33       | 6.67         | 80.00               | 6.67    | 13.33      |
| Clathrin                      | 200    | 12       | Molecular                                 | 66.67     | 16.67       | 8.33         | 8.33                | 83.33   | 8.33       |
| Cohesin                       | 200    | 19       | Molecular                                 | 63.16     | 15.79       | 0.00         | 21.05               | 68.42   | 10.53      |
| Complementary                 | 200    | 17       | Incompatible<br>Ambiguity                 | 5.88      | 52.94       | 5.88         | 35.29               | 29.41   | 35.29      |
| Complementation               | 234    | 19       | Incompatible<br>Ambiguity                 | 21.05     | 15.79       | 0.00         | 63.16               | 21.05   | 15.79      |
| Conformation                  | 200    | 21       | Incompatible<br>Ambiguity                 | 4.76      | 38.10       | 4.76         | 52.38               | 29.41   | 29.41      |
| Cyclin                        | 200    | 13       | Molecular                                 | 23.08     | 23.08       | 30.77        | 23.08               | 61.54   | 15.38      |
| Diploid                       | 234    | 34       | Information<br>Incompatible               | 79.41     | 2.94        | 0.00         | 17.65               | 79.41   | 2.94       |
| Domain                        | 200    | 22       | Incompatible<br>Ambiguity                 | 9.09      | 50.00       | 0.00         | 40.91               | 31.82   | 27.27      |
| Dominant                      | 234    | 28       | Incompatible<br>Ambiguity,<br>Information | 25.00     | 17.86       | 0.00         | 57.14               | 25.00   | 17.86      |

|                                          |     |    |                                           |       |       |       |       |        |       |
|------------------------------------------|-----|----|-------------------------------------------|-------|-------|-------|-------|--------|-------|
| Dynein                                   | 200 | 20 | Molecular                                 | 65.00 | 25.00 | 5.00  | 5.00  | 65.00  | 30.00 |
| Epitope                                  | 200 | 13 | Molecular                                 | 0.00  | 7.69  | 92.31 | 0.00  | 100.00 | 0.00  |
| Exon                                     | 200 | 15 | Information<br>Incompatible<br>Ambiguity, | 33.33 | 20.00 | 6.67  | 40.00 | 46.67  | 13.33 |
| Frequency                                | 234 | 39 | Information                               | 43.59 | 5.13  | 0.00  | 51.28 | 46.15  | 2.56  |
| Gene                                     | 200 | 14 | Information                               | 42.86 | 28.57 | 0.00  | 28.57 | 42.86  | 28.57 |
| Genome                                   | 200 | 14 | Information                               | 57.14 | 14.29 | 14.29 | 14.29 | 64.29  | 21.43 |
| Genome sequence                          | 234 | 30 | Information                               | 60.00 | 20.00 | 0.00  | 30.00 | 66.67  | 13.33 |
| Hydrophobic<br>interaction               | 200 | 12 | Molecular                                 | 50.00 | 33.33 | 0.00  | 16.67 | 50.00  | 33.33 |
| Intron                                   | 200 | 18 | Information                               | 33.33 | 38.89 | 0.00  | 27.78 | 33.33  | 38.89 |
| Kinase                                   | 200 | 13 | Molecular                                 | 30.77 | 38.46 | 15.38 | 15.38 | 53.85  | 30.77 |
| Kinesin                                  | 200 | 19 | Molecular                                 | 63.16 | 15.79 | 5.26  | 15.79 | 78.95  | 5.26  |
| Kinetochores                             | 200 | 16 | Molecular                                 | 50.00 | 25.00 | 12.50 | 12.50 | 68.75  | 18.75 |
| Ligand                                   | 200 | 17 | Molecular                                 | 0.00  | 41.18 | 41.18 | 17.65 | 52.94  | 29.41 |
| Locus                                    | 234 | 21 | Information                               | 52.38 | 4.76  | 0.00  | 42.86 | 57.14  | 0.00  |
| Macromolecular<br>complex                | 200 | 20 | Molecular                                 | 5.00  | 30.00 | 15.00 | 50.00 | 25.00  | 25.00 |
| Microtubule                              | 200 | 11 | Molecular<br>Incompatible                 | 63.64 | 0.00  | 9.09  | 27.27 | 90.91  | 0.00  |
| Model                                    | 200 | 17 | Ambiguity, Practice<br>Incompatible       | 0.00  | 23.53 | 17.65 | 58.82 | 11.76  | 29.41 |
| Most Likely                              | 234 | 38 | Ambiguity, Practice                       | 50.00 | 7.89  | 0.00  | 42.11 | 47.37  | 10.53 |
| Myosin                                   | 200 | 13 | Molecular<br>Incompatible                 | 46.15 | 30.77 | 15.38 | 7.69  | 84.62  | 7.69  |
| Necessary<br>Non-covalent<br>interaction | 200 | 23 | Ambiguity, Practice<br>Molecular          | 78.26 | 0.00  | 0.00  | 21.74 | 78.26  | 0.00  |
| Oncogene                                 | 234 | 29 | Information<br>Incompatible               | 34.48 | 10.34 | 0.00  | 55.17 | 27.59  | 17.24 |
| Parental                                 | 234 | 24 | Ambiguity,                                | 45.83 | 37.50 | 0.00  | 16.67 | 50.00  | 33.33 |

|                  |     |    |                                                    |       |       |       |       |       |       |
|------------------|-----|----|----------------------------------------------------|-------|-------|-------|-------|-------|-------|
| Phenotype        | 200 | 13 | Information<br>Information<br>Incompatible         | 30.77 | 23.08 | 0.00  | 46.15 | 46.15 | 7.69  |
| Polarity         | 200 | 22 | Ambiguity                                          | 40.91 | 9.09  | 9.09  | 40.91 | 45.45 | 13.64 |
| Protease         | 200 | 13 | Molecular                                          | 46.15 | 23.08 | 15.38 | 15.38 | 38.46 | 46.15 |
| Proto-oncogene   | 234 | 25 | Information                                        | 24.00 | 20.00 | 8.00  | 48.00 | 24.00 | 28.00 |
| Recombinant      | 234 | 21 | Information<br>Incompatible<br>Ambiguity,          | 66.67 | 14.29 | 0.00  | 19.05 | 66.67 | 14.29 |
| Repressor        | 200 | 15 | Molecular                                          | 33.33 | 40.00 | 0.00  | 26.67 | 26.67 | 53.33 |
| SNARE            | 200 | 11 | Molecular                                          | 63.64 | 0.00  | 0.00  | 36.36 | 45.45 | 18.18 |
| Sufficient       | 200 | 11 | Incompatible<br>Ambiguity                          | 45.45 | 18.18 | 0.00  | 36.36 | 45.45 | 18.18 |
| Template         | 200 | 12 | Information<br>Incompatible<br>Ambiguity,          | 16.67 | 50.00 | 0.00  | 33.33 | 16.67 | 50.00 |
| Theory           | 200 | 16 | Information<br>Incompatible<br>Ambiguity, Practice | 31.25 | 25.00 | 6.25  | 37.50 | 25.00 | 37.50 |
| Transcription    | 200 | 18 | Information<br>Incompatible<br>Ambiguity,          | 33.33 | 27.78 | 16.67 | 22.22 | 33.33 | 44.44 |
| Translation      | 200 | 13 | Information                                        | 61.54 | 15.38 | 0.00  | 23.08 | 61.54 | 15.38 |
| Tubulin          | 200 | 13 | Molecular                                          | 84.62 | 0.00  | 0.00  | 15.38 | 76.92 | 7.69  |
| Tumor suppressor | 234 | 26 | Information                                        | 34.62 | 15.38 | 3.85  | 46.15 | 42.31 | 11.54 |
